# Supplementary material
Source: publisher site journal article supplement (https://www.dovepress.com/article/303822)
Supplement: Supplementary file 1 [file get_supplementary_file.php]

## Supplementary materials

**Table S1. I have been satisfied with my quality of life in the last year/ the patient I take care of has been satisfied with their quality of life in the last year?**

| <b>PwH (%)</b> | <b>CPwH (%)</b> | <b>Total (%)</b> |
|----------------|-----------------|------------------|
| 48             | 42              | 46               |

**Table S2. Have you heard about new treatment options in the last 6 months?**

| <b>Answer</b> | <b>PwH (%)</b> | <b>CPwH (%)</b> | <b>Total (%)</b> |
|---------------|----------------|-----------------|------------------|
| Yes           | 55             | 63              | 58               |
| No            | 45             | 37              | 42               |

**Table S3. How much does the bleeding disorder affect your mobility / the patient you take care of in her/his mobility?**

| <b>Answer</b> | <b>PwH (%)</b> | <b>CPwH (%)</b> | <b>Total (%)</b> |
|---------------|----------------|-----------------|------------------|
| Not at all    | 17             | 24              | 20               |
| Slightly      | 26             | 30              | 27               |
| Moderately    | 30             | 23              | 27               |
| Very          | 18             | 17              | 18               |
| Very much     | 9              | 6               | 8                |

**Table S4. How much does the bleeding disorder affect your family life / the patient you take care of in her/his family life?**

| <b>Answer</b> | <b>PwH (%)</b> | <b>CPwH (%)</b> | <b>Total (%)</b> |
|---------------|----------------|-----------------|------------------|
| Not at all    | 37             | 36              | 36               |
| Slightly      | 30             | 30              | 30               |
| Moderately    | 20             | 23              | 21               |
| Very          | 9              | 10              | 9                |
| Very much     | 5              | 2               | 4                |

**Table S5. How much does the bleeding disorder affect your life with current partner or ability to find a partner / the patient you take care of in her/his life with current partner or ability to find a partner?**

| <b>Answer</b> | <b>PwH (%)</b> | <b>CPwH (%)</b> | <b>Total (%)</b> |
|---------------|----------------|-----------------|------------------|
| Not at all    | 55             | 55              | 55               |
| Slightly      | 19             | 20              | 19               |
| Moderately    | 14             | 18              | 15               |
| Very          | 5              | 6               | 5                |
| Very much     | 7              | 2               | 5                |

**Table S6. How much does the bleeding disorder affect your education/work life / the patient you take care of in her/his education/work life?**

| <b>Answer</b> | <b>PwH (%)</b> | <b>CPwH (%)</b> | <b>Total (%)</b> |
|---------------|----------------|-----------------|------------------|
| Not at all    | 40             | 41              | 40               |

|            |    |    |    |
|------------|----|----|----|
| Slightly   | 22 | 22 | 22 |
| Moderately | 22 | 21 | 22 |
| Very       | 9  | 11 | 10 |
| Very much  | 6  | 5  | 6  |

**Table S7. How much does the bleeding disorder affect your hobbies / the patient you take care of in her/his hobbies?**

| Answer     | PwH (%) | CPwH (%) | Total (%) |
|------------|---------|----------|-----------|
| Not at all | 25      | 17       | 22        |
| Slightly   | 22      | 28       | 24        |
| Moderately | 32      | 27       | 30        |
| Very       | 13      | 19       | 15        |
| Very much  | 9       | 10       | 9         |

**Table S8. How much does the bleeding disorder affect your daily routines / the patient you take care of in her/his daily routines?**

| Answer     | PwH (%) | CPwH (%) | Total (%) |
|------------|---------|----------|-----------|
| Not at all | 29      | 23       | 27        |
| Slightly   | 30      | 38       | 33        |
| Moderately | 26      | 27       | 26        |
| Very       | 9       | 10       | 10        |
| Very much  | 6       | 3        | 5         |

**Table S9. How much does the bleeding disorder affect your happiness / the patient you take care of in her/his happiness?**

| Answer     | PwH (%) | CPwH (%) | Total (%) |
|------------|---------|----------|-----------|
| Not at all | 35      | 39       | 37        |
| Slightly   | 22      | 23       | 23        |
| Moderately | 21      | 24       | 22        |
| Very       | 10      | 10       | 10        |
| Very much  | 11      | 5        | 9         |

CPwH: caregivers of people with hemophilia; PwH: people with hemophilia.

**Figure S1. Profile of respondents spending <15 minutes with their physician at each follow-up visit**

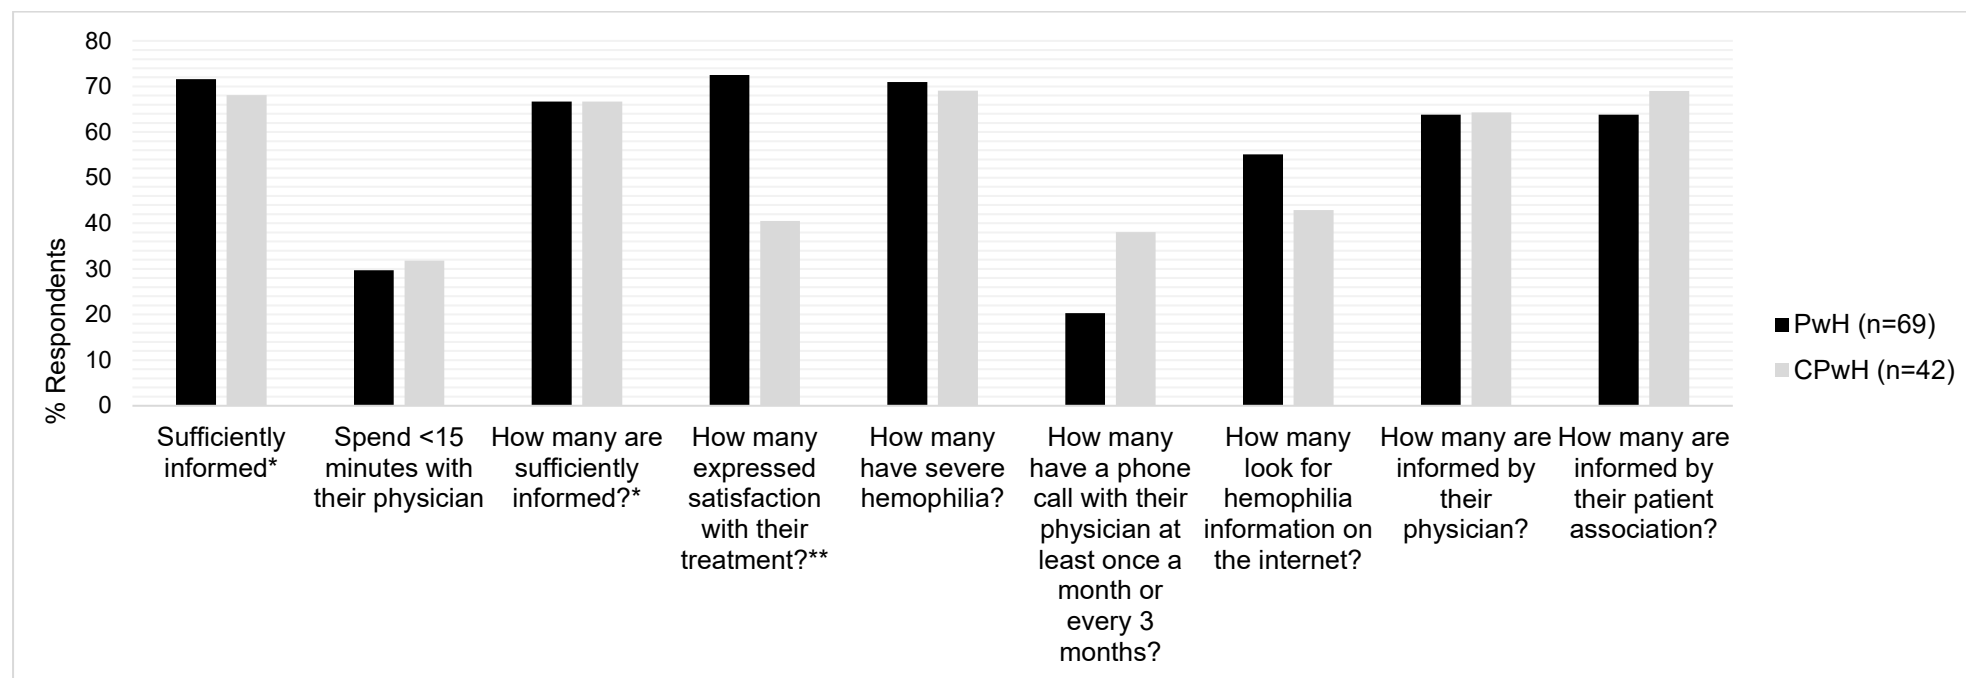

\* Sufficiently informed = well or very well informed about living with hemophilia and the latest scientific developments.

\*\* Satisfied with treatment = In the last year, I have been satisfied with my treatment / the patient I take care of has been satisfied with their treatment.

CPwH: caregivers of people with hemophilia; PwH: people with hemophilia.
